# Supplementary material for: Susceptible and mCry3A resistant corn rootworm larvae killed by a non-hemolytic Bacillus thuringiensis Cyt1Aa mutant
Source: PubMed Central journal article supplement (PMC6292897; doi:10.1038/s41598-018-36205-6), 2018-12-13

# Susceptible and mCry3A resistant corn rootworm larvae killed by a non-hemolytic *Bacillus thuringiensis* Cyt1Aa mutant.

Alejandra Bravo<sup>1\*</sup>, Jazmin A. López-Díaz<sup>1</sup>, Takashi Yamamoto<sup>2</sup>, Kathleen Harding<sup>2</sup>, Jian-Zhou Zhao<sup>3</sup>, Gretel Mendoza<sup>1</sup>, Janette Onofre<sup>1</sup>, MaryCarmen Torres<sup>1</sup>, Mark E Nelson<sup>3</sup>, Gusui Wu<sup>2</sup>, Amit Sethi<sup>3</sup>, and Mario Soberón<sup>1</sup>.

**Supplementary figure S1.** Complete SDS-PAGE of the Cyt1Aa mutants. All samples were boiled 5 min before loading into the SDS-PAGE and the gel was stained with coomassie brilliant blue.

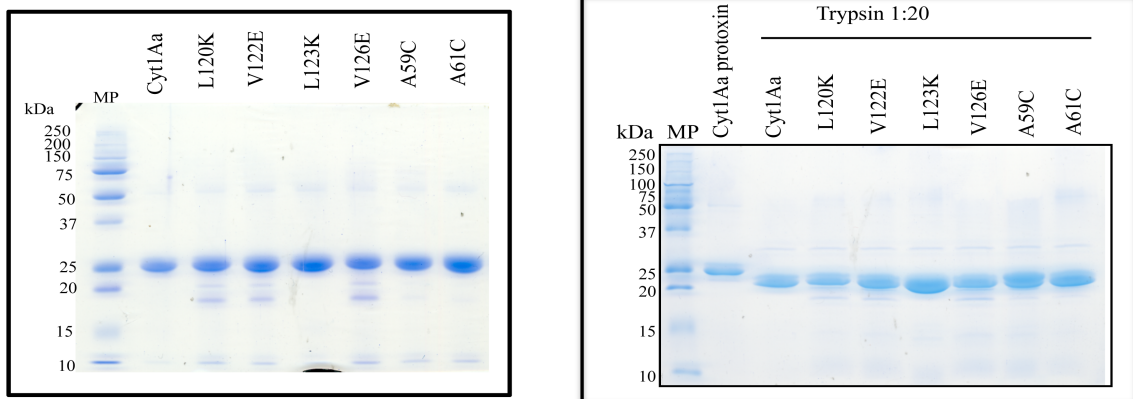

**Supplementary figure S2.** Additional images of SDS-PAGE analysis of the Cyt1Aa, A59C and A61C proteins purified from *B. thuringiensis*. All samples were boiled 5 min before loading into the SDS-PAGE and the gel was stained with coomassie brilliant blue.

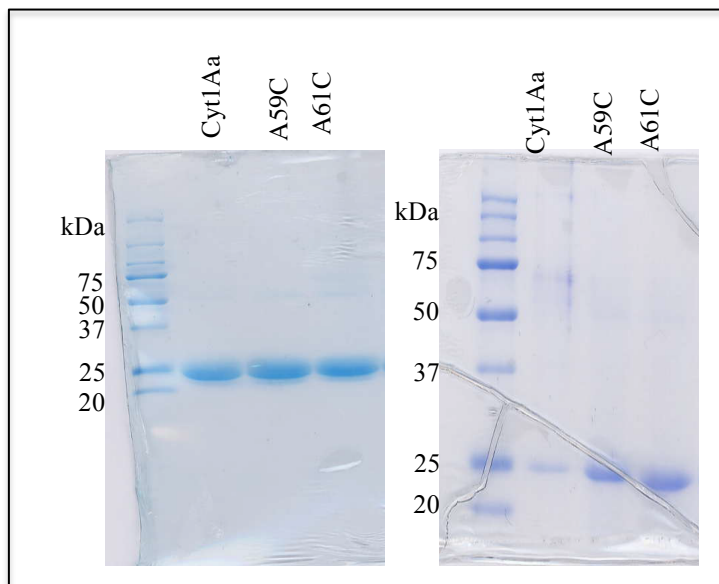

**Supplementary figure S3.** Additional images of the oligomerization analysis of Cyt1Aa and mutant proteins after activation of solubilized protoxin, with trypsin in the presence of SUV liposomes. Samples were heated 3 min at 65 °C before loading into the SDS-PAGE transferred to PVDF and revealed in western blot assay as described in materials and methods using polyclonal anti-Cyt1A antibody and goat anti-rabbit antibody coupled to horseradish peroxidase.

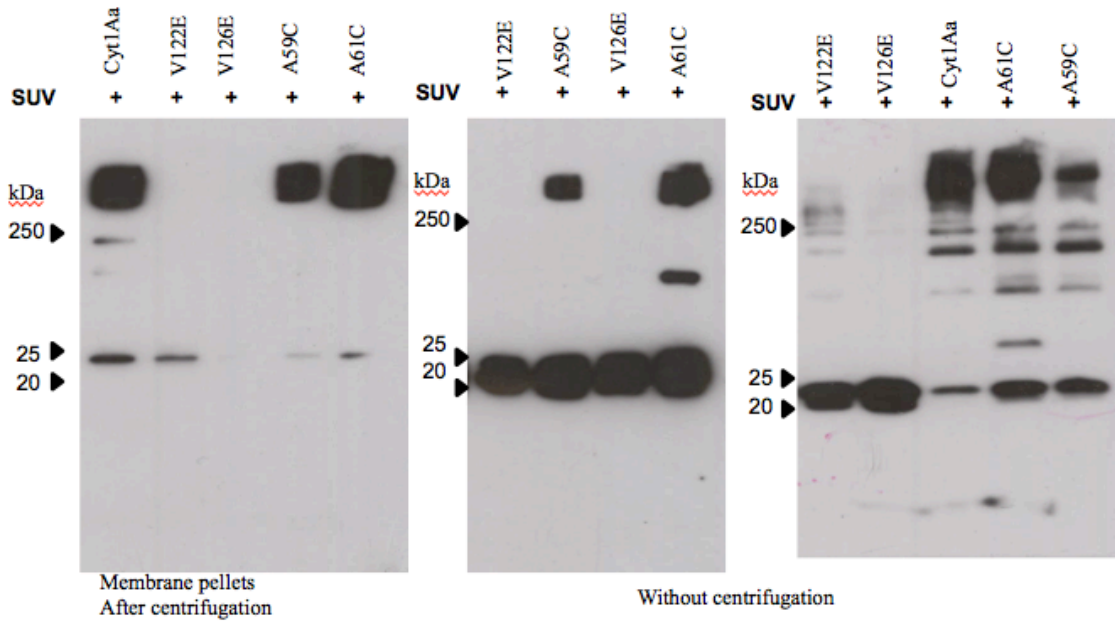

Supplement: 41598_2018_36205_MOESM1_ESM.pdf [file 41598_2018_36205_MOESM1_ESM.pdf]
